# Supplementary material
Source: PubMed Central journal article supplement (PMC3708182)

# **Proteomic differences between hepatocellular carcinoma and non-tumorous liver tissue investigated by a combined 2D-DIGE and label-free quantitative proteomics study**

## **Supplemental Data 6:**

### Content:

- Exemplary gel image of a Cy2-labeled internal standard. Proteins found in the gel- and LCMS-based study (51 proteins) are marked.
- Gel images of Cy3- and Cy5-labeled samples used in the quantitative 2D-DIGE study

Gel image of a Cy2-labeled internal standard

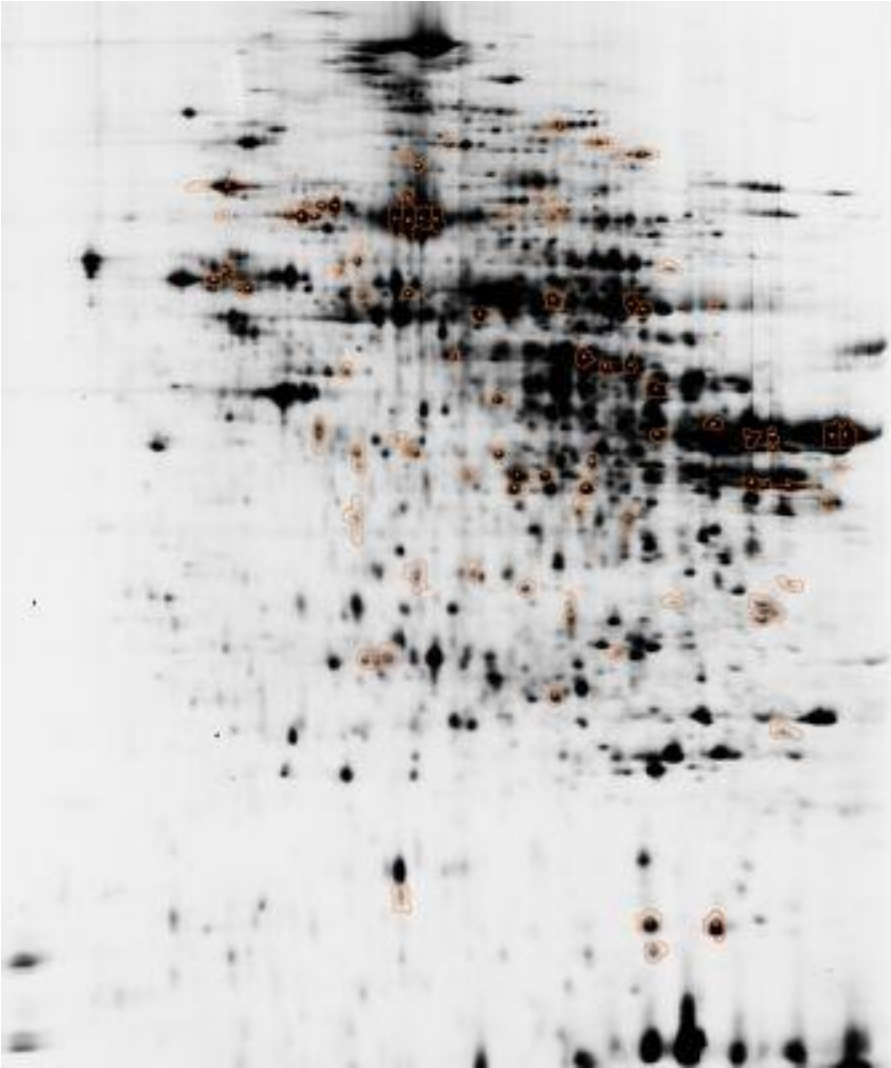

**Gel images patient ID 1**

Cy3 Tumor

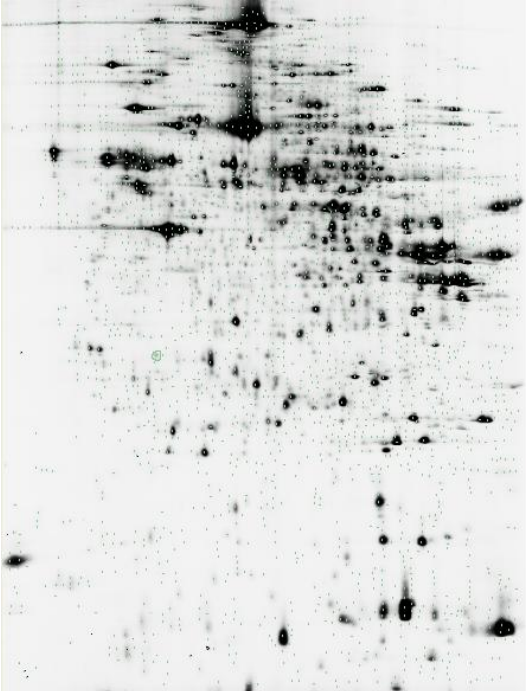

Cy5 Normal

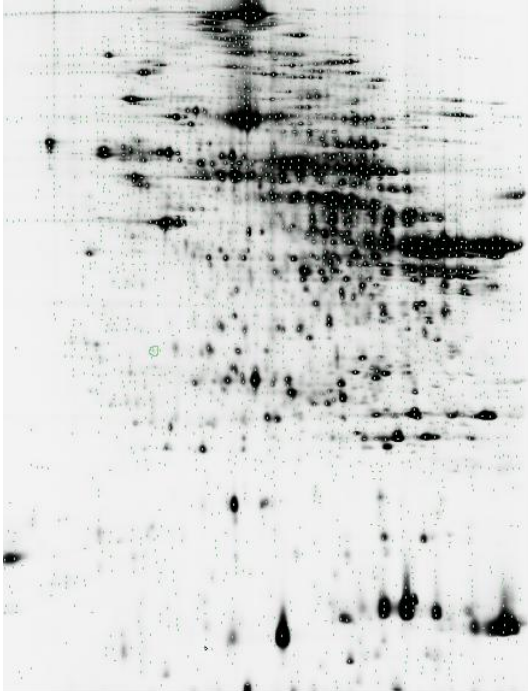

**Gel images patient ID 2**

Cy3 Normal

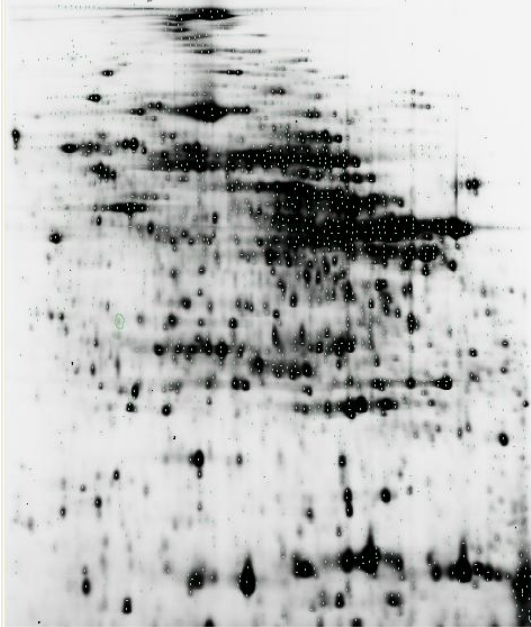

Cy5 Tumor

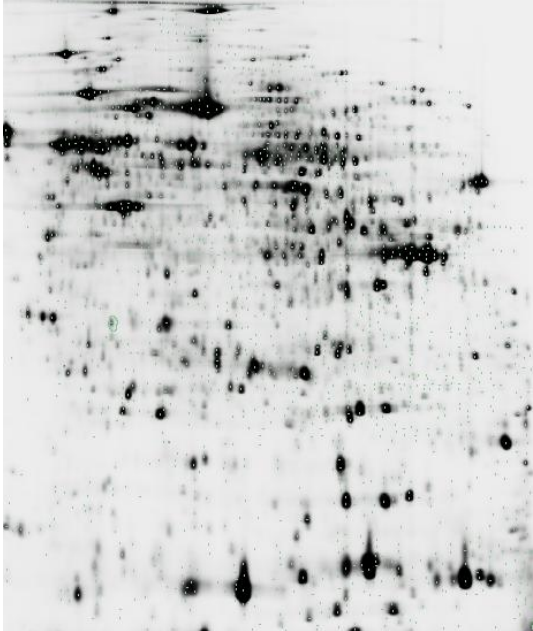

**Gel images patient ID 3**

Cy3 Tumor

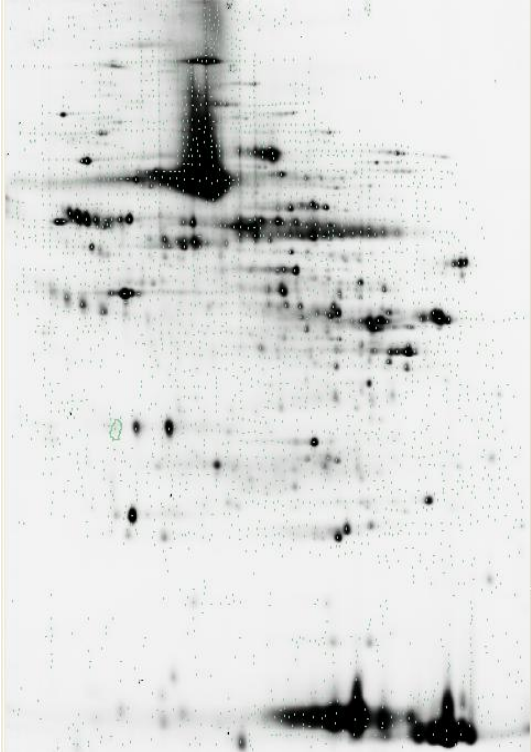

Cy5 Normal

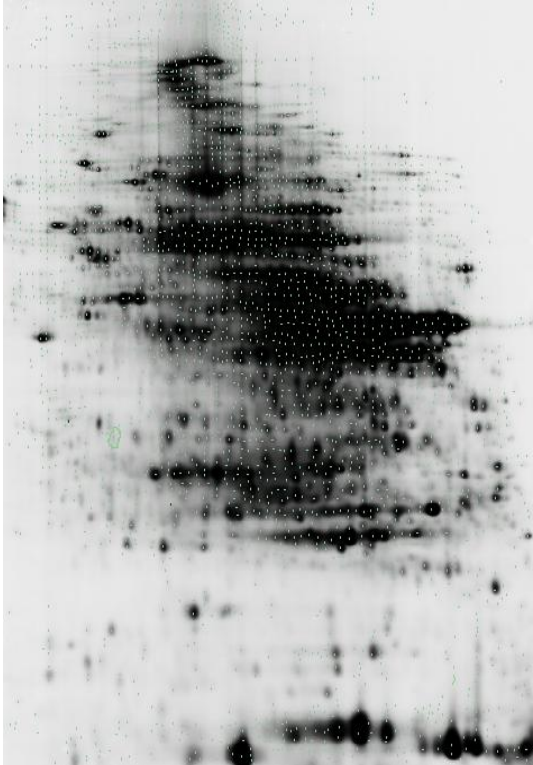

**Gel images patient ID 4**

Cy3 Normal

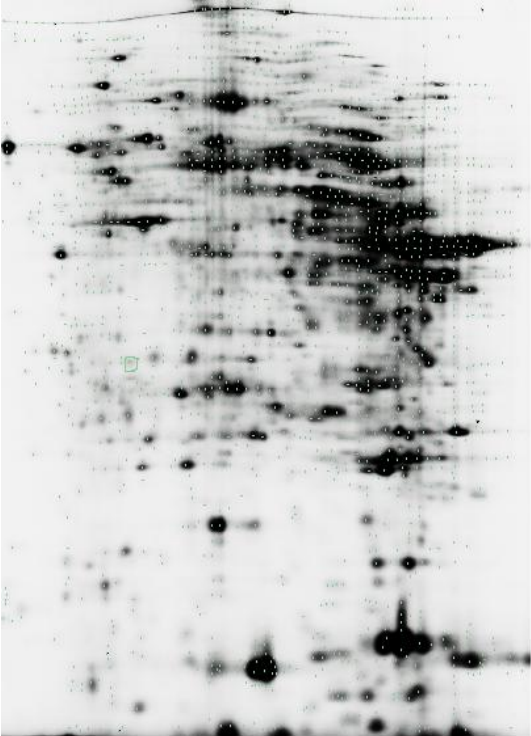

Cy5 Tumor

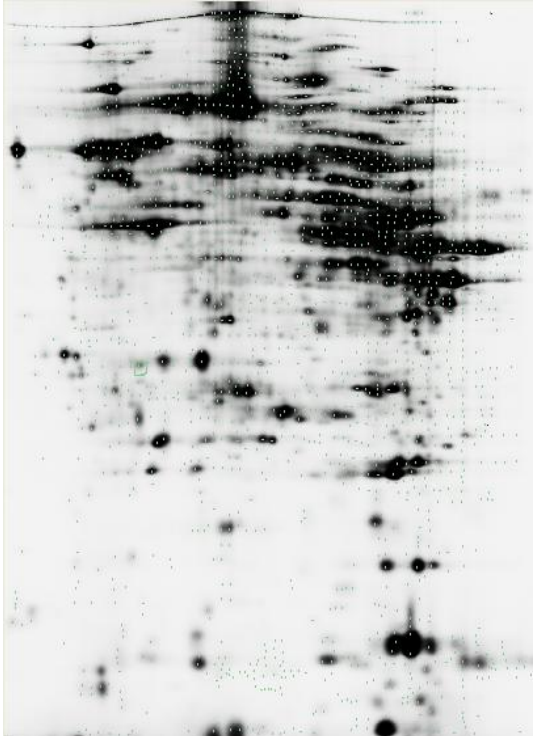



**Gel images patient ID 5**

Cy3 Tumor

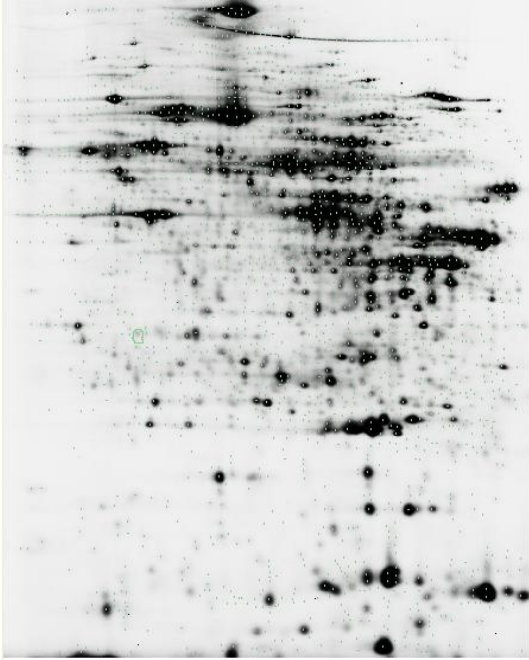

Cy5 Normal

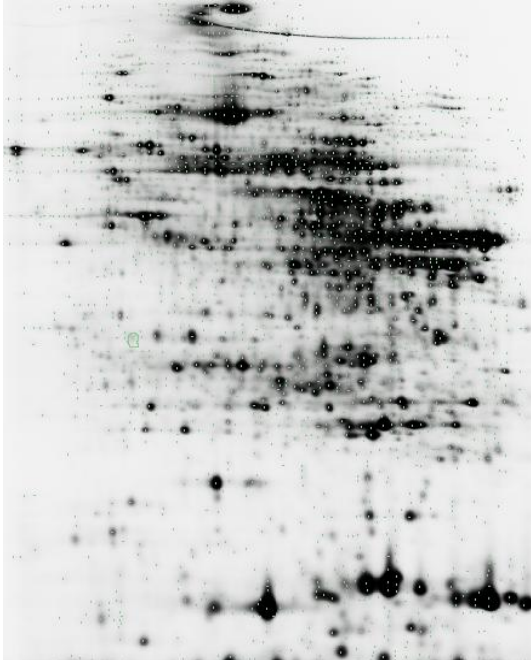

**Gel images patient ID 6**

Cy3 Normal

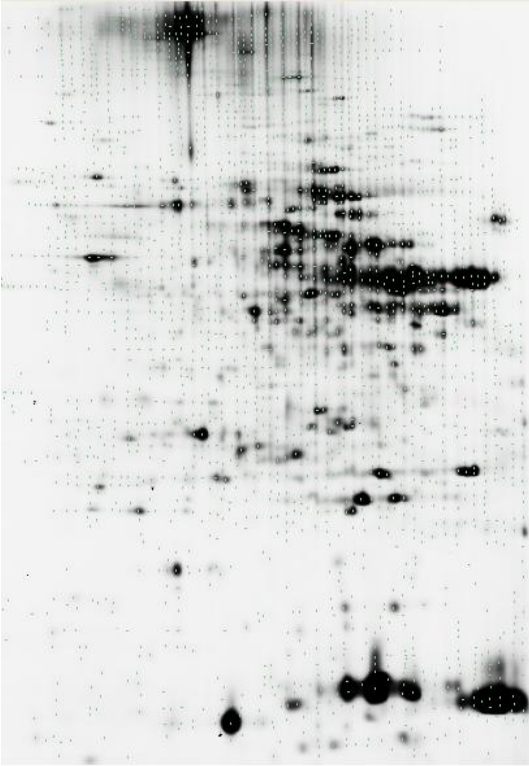

Cy5 Tumor

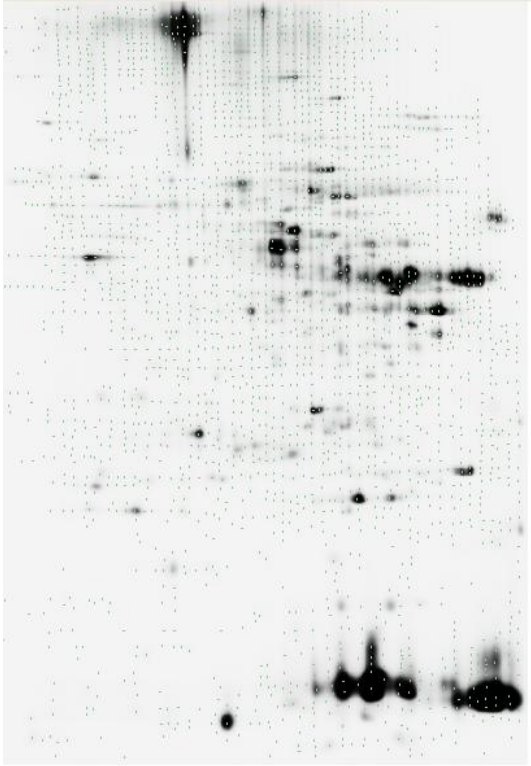

**Gel images patient ID 7-8**

Cy3 Tumor (Patient 8)

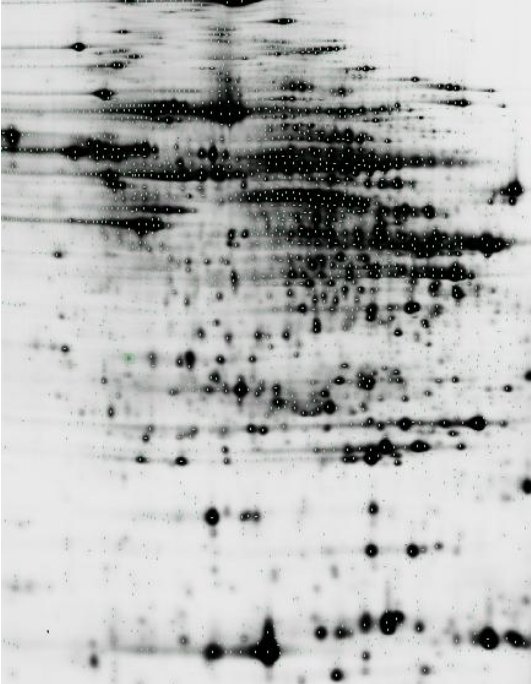

Cy5 Normal (Patient 7)

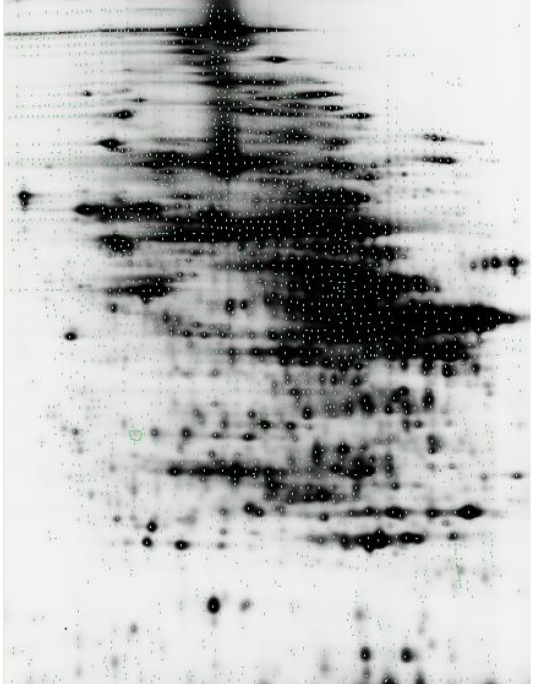

Supplement: supp_M113.028027_mcp.M113.028027-6.pdf [file supp_M113.028027_mcp.M113.028027-6.pdf]
