# Supplementary material
Source: PubMed Central journal article supplement (PMC3708182)

**Proteomic differences between hepatocellular carcinoma  
and non-tumorous liver tissue investigated by a combined  
2D-DIGE and label-free quantitative proteomics study**

**Supplemental Data 7:**

Content:

- Coomassie-stained gel of the samples used in the second verification experiment.
- Western blots and densitometric analysis of the six candidate proteins.

Coomassie-stained gel of the sample set used in the 2<sup>nd</sup> verification

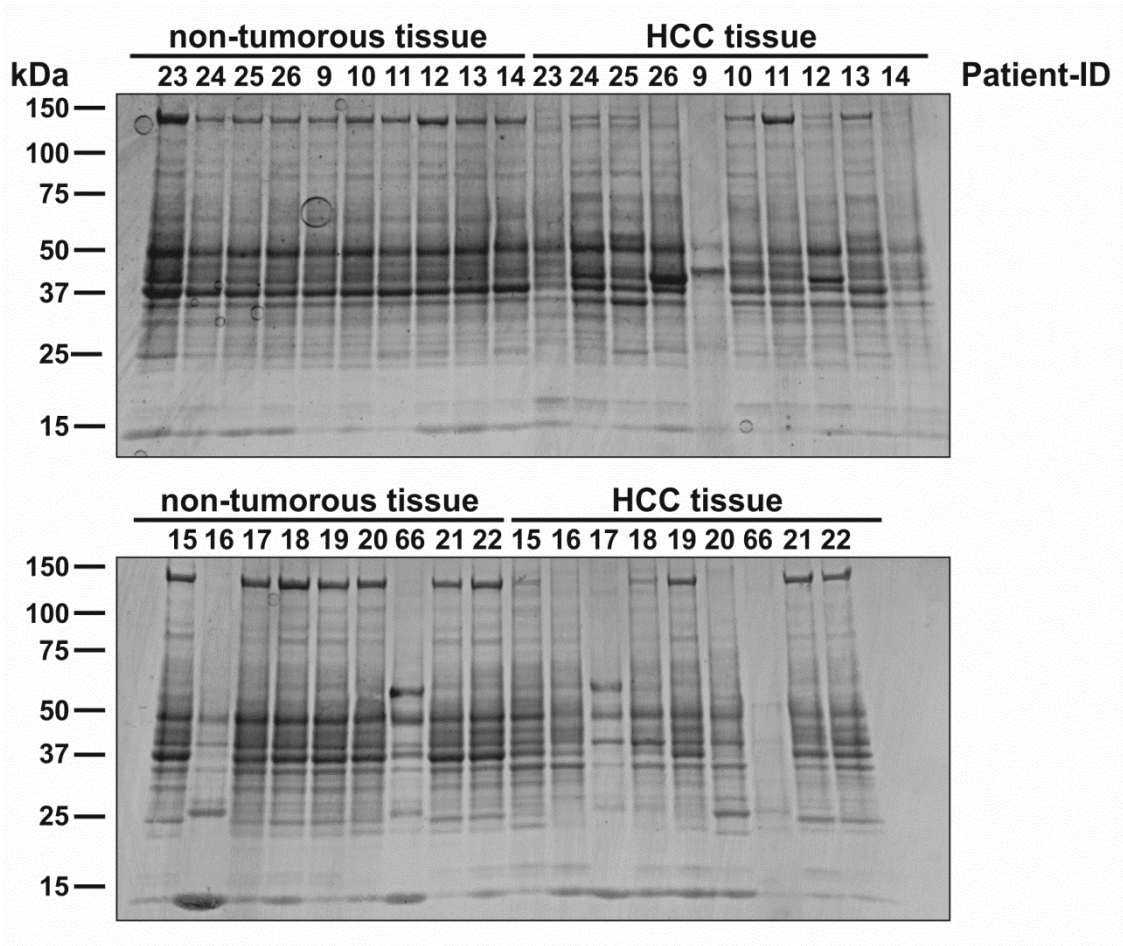

Coomassie-stained gel of the samples used in the second verification set shows the degradation of the following samples: 9 (tumor), 16(non-tumor), 17 (tumor), 66 (both states). These samples were excluded during densitometric analysis.

## Western blots and densitometric analysis of the six candidate proteins

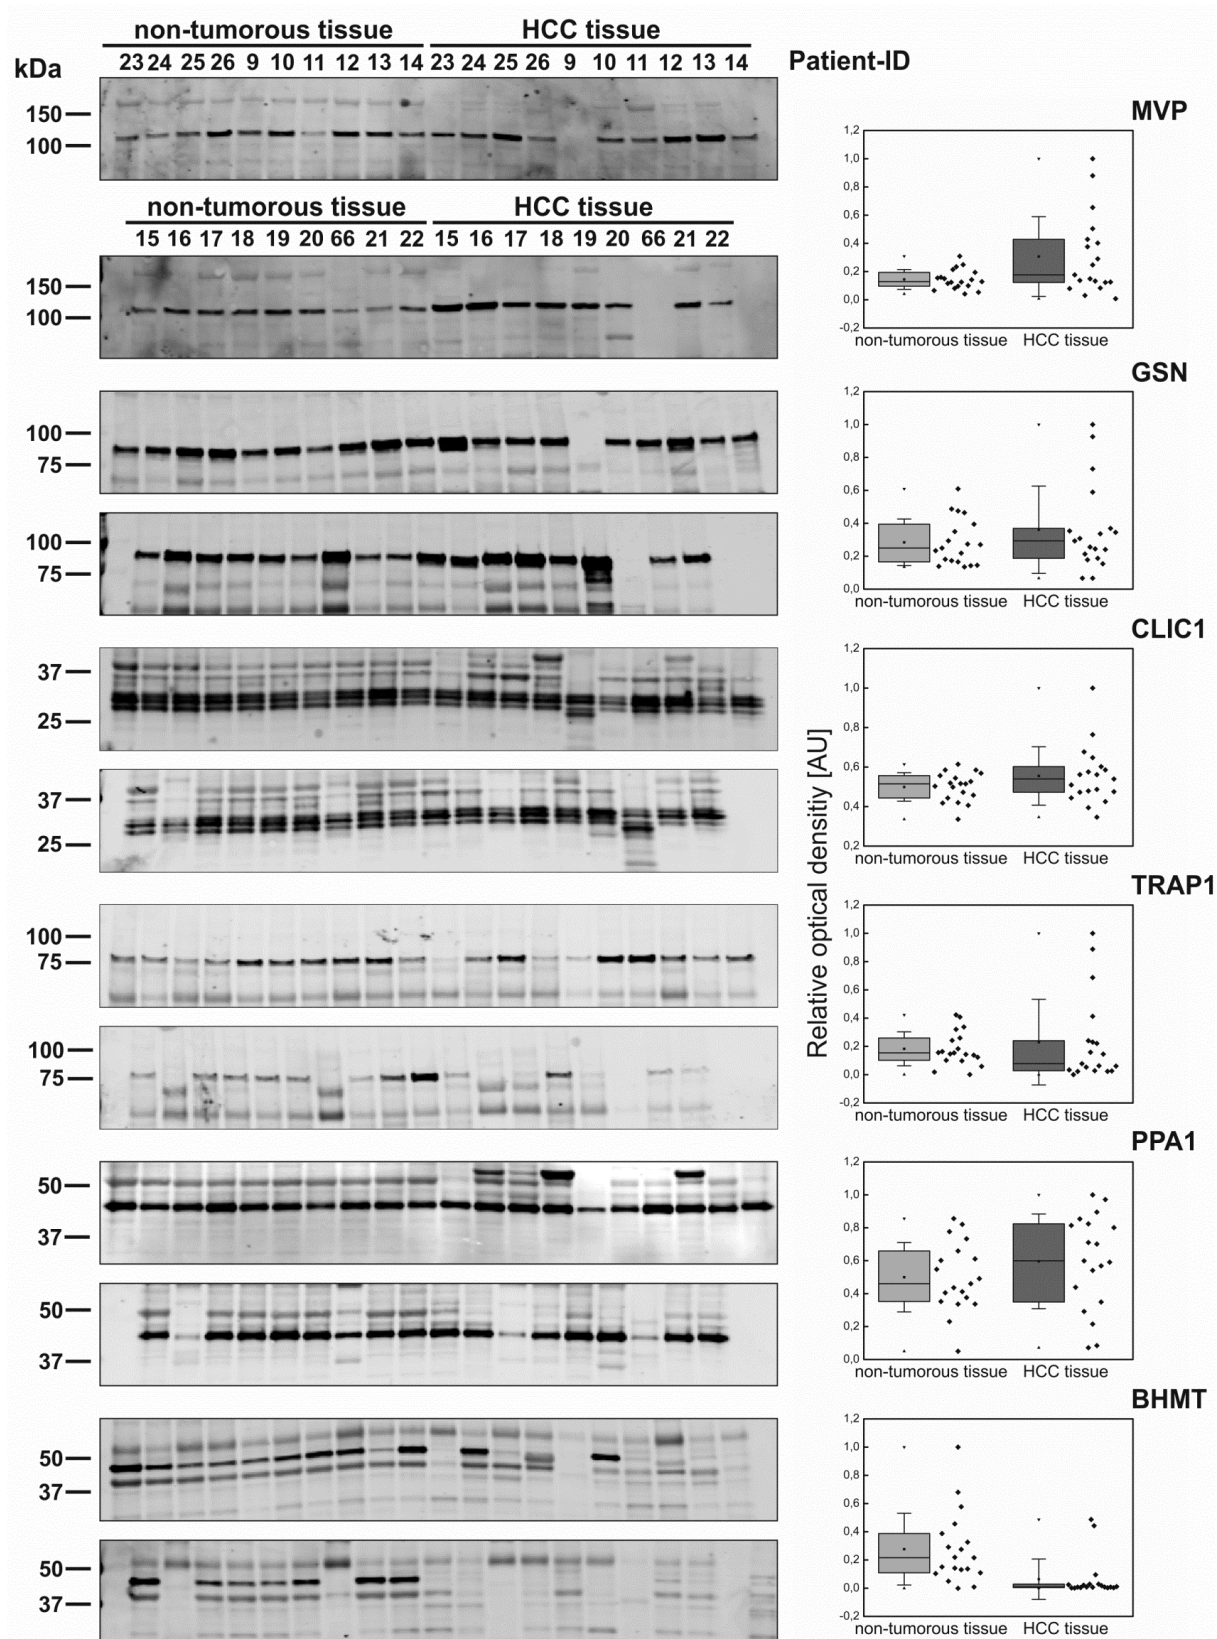

Supplement: supp_M113.028027_mcp.M113.028027-7.pdf [file supp_M113.028027_mcp.M113.028027-7.pdf]
